# Supplementary material for: Eliminating all bonds from the ground state gives rise to ionic bonding in high-spin states of heterodiatomics
Source: Royal Society of Chemistry journal article supplement (doi:10.1039/d3cp01781h), 2023-01-01
Supplement: d3cp01781h1.pdf [file d3cp01781h1.pdf]

## Supporting Information (SI)

### **Eliminating all bonds from the ground state gives rise to ionic bonding in high spin states of heterodiatomics**

Ishita Bhattacharjee, Debashree Ghosh\* and Ankan Paul\*

#### Contents

- S1. Computational details
- S2. Potential Energy Curves (PECs)
- S3. High spin ionic states and their NBO charges
- S4. Ground state of BN

## S1. COMPUTATIONAL DETAILS

All the Hartree Fock (HF)<sup>1</sup>, complete active space self-consistent field (CASSCF)<sup>2</sup> and multi-reference configuration interaction (MRCI) computations have been done using MOLPRO<sup>3</sup> quantum mechanical package. The wavefunctions for the CASSCF computations are considered using full configuration interactions of 'm' electrons in 'n' orbitals and they may be denoted as CAS(m,n). For all the systems mentioned in the manuscript, we have taken full valence CAS i.e. (8,8) for C<sub>2</sub> and its isoelectronics and (10,8) for N<sub>2</sub> and its isoelectronics respectively. We have used cc-pVQZ<sup>4</sup> basis set for all the aforementioned computations. Additionally, in order to include effects of dynamic correlation, we have performed MRCI computations using the CASSCF orbitals.

The potential energy curves (PECs) are obtained by scanning the CASSCF energy values along the X-Y bond distance (X, Y: the atoms constituting the above-mentioned diatomic systems) at an interval of 0.05 Å starting from 0.5 Å to 7.0 Å. However, to get a magnified view we have given the PECs upto 4.5 Å.

All the PECs obtained from CASSCF and MRCI computations are plotted using GNU PLOT<sup>5</sup> program. The PECs obtained from the state specific CASSCF computations included a lot of avoided crossings. So, in order to smoothen out the curves, we have taken into account state-averaged PECs for all the spin states (apart from the nonet spin states of C<sub>2</sub>, BN, BeO and LiF, since only one configuration state function is possible for those).

## S2. POTENTIAL ENERGY CURVES (PECs)

### 1. CASSCF PECs of the four spin states of (a)BF and (b) CO

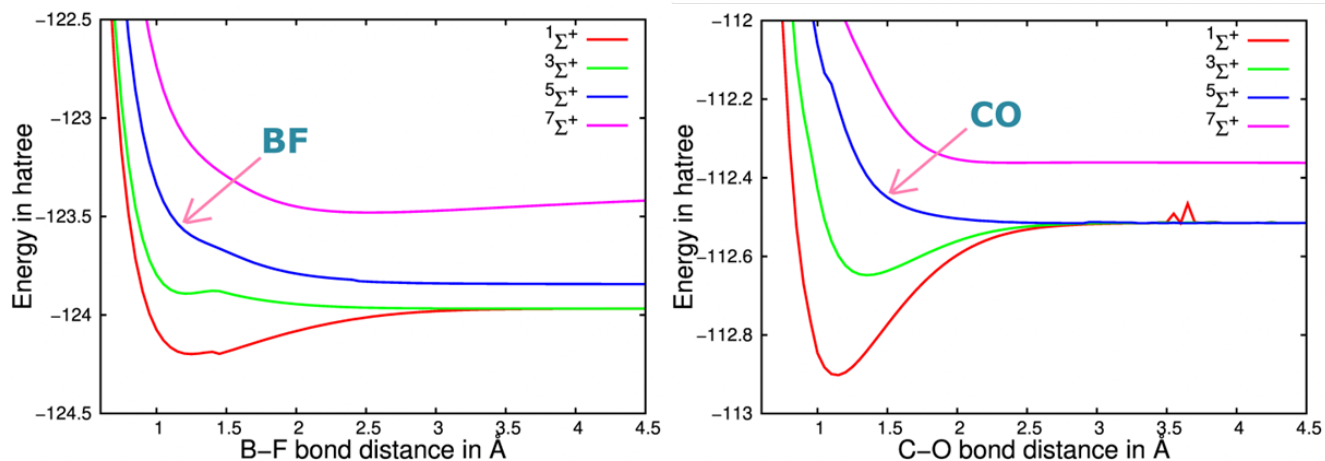

2. MRCI PECs of the four spin states of (a) BF and (b) CO

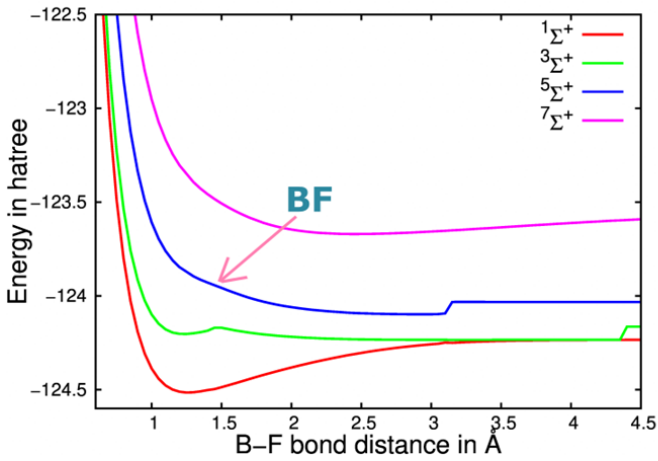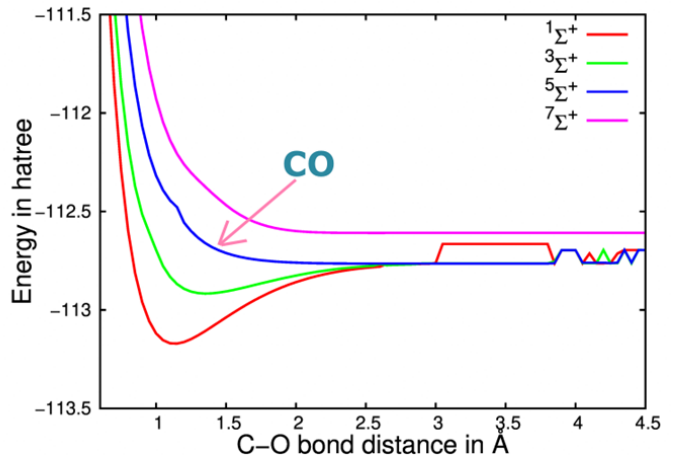

3. MRCI PECs of the four spin states of (a) BN (b) LiF (c) C<sub>2</sub> and (b) BeO

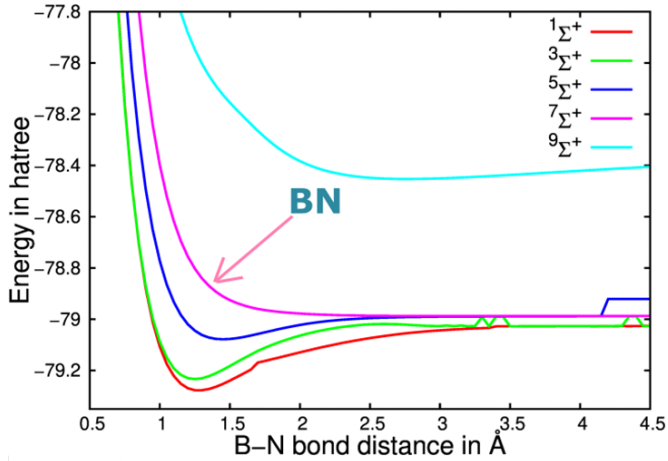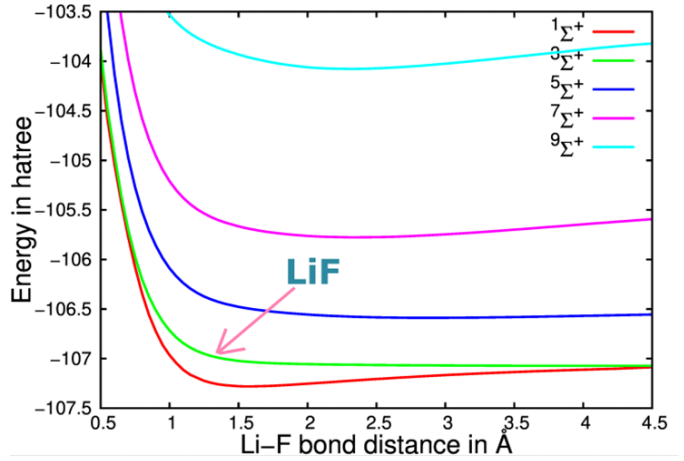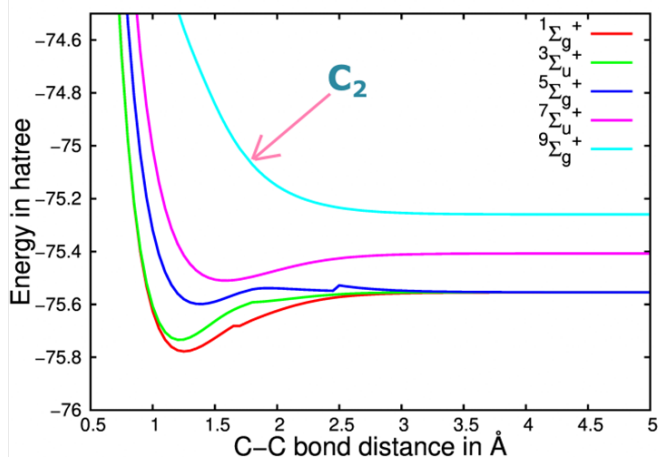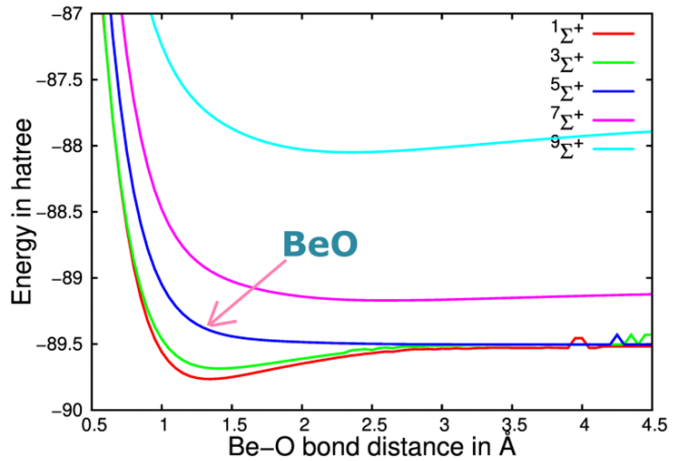

### S3. HIGH SPIN IONIC STATES AND THEIR NBO CHARGES

In the main manuscript, we have discussed that as we decimate all the covalent bonds in the high spin states, we attain purely ionic states. For instance, in case of BN complete dissociation occurs in  ${}^7\Sigma^+$  state. As we plot the PEC of the  ${}^9\Sigma^+$  state, we obtain an ionic picture.<sup>6</sup> It is obvious because  ${}^9\Sigma^+$  is only achievable if an electron is transferred from the nitrogen atom to the boron atom, thus rendering a positive charge on nitrogen and a negative charge on boron. To reinforce this fact, we further computed NBO charges for all the spin states of BN at equilibrium B-N distance of the ionic state (2.75 Å) and at dissociation (7.00 Å). It showed a +1 charge on the nitrogen atom and a -1 charge on the boron atom in the  ${}^9\Sigma^+$  state for both the distances. The table depicting the NBO charges for all possible spin states of BN is given below.

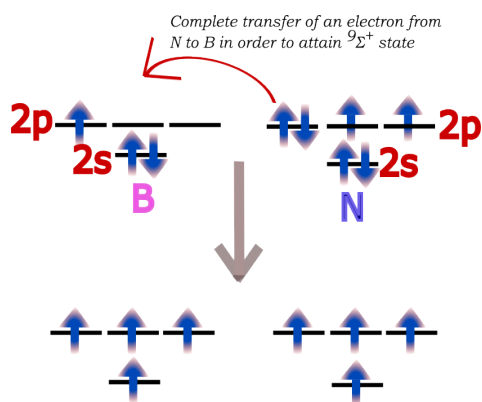

| B-N distance      | 2.75 Å            | 7.00 Å            |
|-------------------|-------------------|-------------------|
| Spin Multiplicity | (Boron, Nitrogen) | (Boron, Nitrogen) |
| ${}^1\Sigma^+$    | +0.198, -0.198    | 0.000, 0.000      |
| ${}^3\Sigma^+$    | +0.115, -0.115    | 0.000, 0.000      |
| ${}^5\Sigma^+$    | +0.003, -0.003    | 0.000, 0.000      |
| ${}^7\Sigma^+$    | +0.003, -0.003    | 0.000, 0.000      |
| ${}^9\Sigma^+$    | -0.995, +0.995    | -0.999, +0.999    |

We expected similar results for the isoelectronics BeO and LiF. In BeO as the dissociation occurs at the  ${}^5\Sigma^+$ , purely ionic states are obtained from  ${}^7\Sigma^+$  state onwards and for LiF, the ionic states start from  ${}^5\Sigma^+$  state. The tables depicting the NBO charges for these species are given below.

| Be-O distance     | 2.65 Å            | 7.00 Å            |
|-------------------|-------------------|-------------------|
| Spin Multiplicity | (Boron, Nitrogen) | (Boron, Nitrogen) |
| ${}^1\Sigma^+$    | +0.676, -0.676    | 0.000, 0.000      |
| ${}^3\Sigma^+$    | +0.058, -0.058    | 0.000, 0.000      |
| ${}^5\Sigma^+$    | +0.019, -0.019    | 0.000, 0.000      |
| ${}^7\Sigma^+$    | -0.987, +0.987    | -0.999, +0.999    |
| ${}^9\Sigma^+$    | -1.514, +1.514    | -1.000, +1.000    |

| Li-F distance     | 2.95 Å            | 7.00 Å            |
|-------------------|-------------------|-------------------|
| Spin Multiplicity | (Boron, Nitrogen) | (Boron, Nitrogen) |
| ${}^1\Sigma^+$    | +0.929, -0.929    | +0.938, -0.938    |
| ${}^3\Sigma^+$    | +0.000, -0.000    | 0.000, 0.000      |
| ${}^5\Sigma^+$    | -0.976, +0.976    | -0.999, +0.999    |
| ${}^7\Sigma^+$    | -1.634, +1.634    | -1.000, +1.000    |
| ${}^9\Sigma^+$    | -1.284, +1.284    | -1.009, +1.009    |

### S4. GROUND STATE OF BN

Although the CASSCF ground state of BN is  ${}^1\Sigma^+$ , inclusion of dynamical correlation reports  ${}^3\Pi$  to be the ground state. Furthermore, experimental results are consistent with it.<sup>7</sup> However, both these states are at close proximity to each other. Since in this manuscript we have mostly focused on CASSCF studies of sigma states, we have looked into the  ${}^1\Sigma^+$  only. Further, our hypothesis can be modified and used in case of triplet ground states if we rearrange the electrons in the CAS space in order to achieve a singlet state associated with the particular triplet state, which is indeed  ${}^1\Sigma^+$  in the case of BN. Detailed discussion on

this has been done in our previous article where we delineated how we can adapt our hypothesis to predict the bond orders of O<sub>2</sub> and B<sub>2</sub>, both of which are known to have triplet ground states.<sup>8</sup>

#### References

1. A. Szabo and N.S. Ostlund, *Modern Quantum Chemistry: Introduction to Advanced Electronic Structure Theory*.
2. J.M.O. Matos and B.O. Roos, *Theor Chim Acta.*, 1988, **74**, 363-379.
3. (a) H. J. Werner, P. J. Knowles, G. Knizia, F. R. Manby and M. Schütz, *Comput. Mol. Sci.*, 2012, **2**, 242-253. (b) H. J. Werner, P. J. Knowles, G. Knizia, F. R. Manby, M. Schütz, P. Celani, and A. Mitrushenkov, MOLPRO, version 2015.1, a package of ab initio programs. 2015, University of Cardiff Chemistry Consultants (UC3): Cardiff, Wales, UK.
4. E. Papajak, H.R. Leverentz, J. Zheng and D.G. Truhlar, 2009, *J. Chem. Theory Comput.*, 2009, **5**, 1197-1202.
5. T. Williams and C. Kelley, 2011, *Gnuplot 4.5: an interactive plotting program*, URL <http://gnuplot.info>.
6. S. Hou, A.H. Qureshi, and Z. Wei, *ACS omega*, 2018, **3(12)**, 17180-17187.
7. J.M.L. Martin, J.L. Timothy, G.E. Scuseria, and P.R. Taylor, *Chem. Phys.*, 1992, **97(9)**, 6549-6556.
8. I. Bhattacharjee, D. Ghosh, and A. Paul, *Chemical science*, 2020, **11(27)**, 7009-7014.
